# Supplementary material for: Differential signalling requirements for RIPK1-dependent pyroptosis in neutrophils and macrophages
Source: PubMed Central journal article supplement (PMC11224406; doi:10.1038/s41419-024-06871-8), 2024-07-04

Figure 1A uncropped western blots

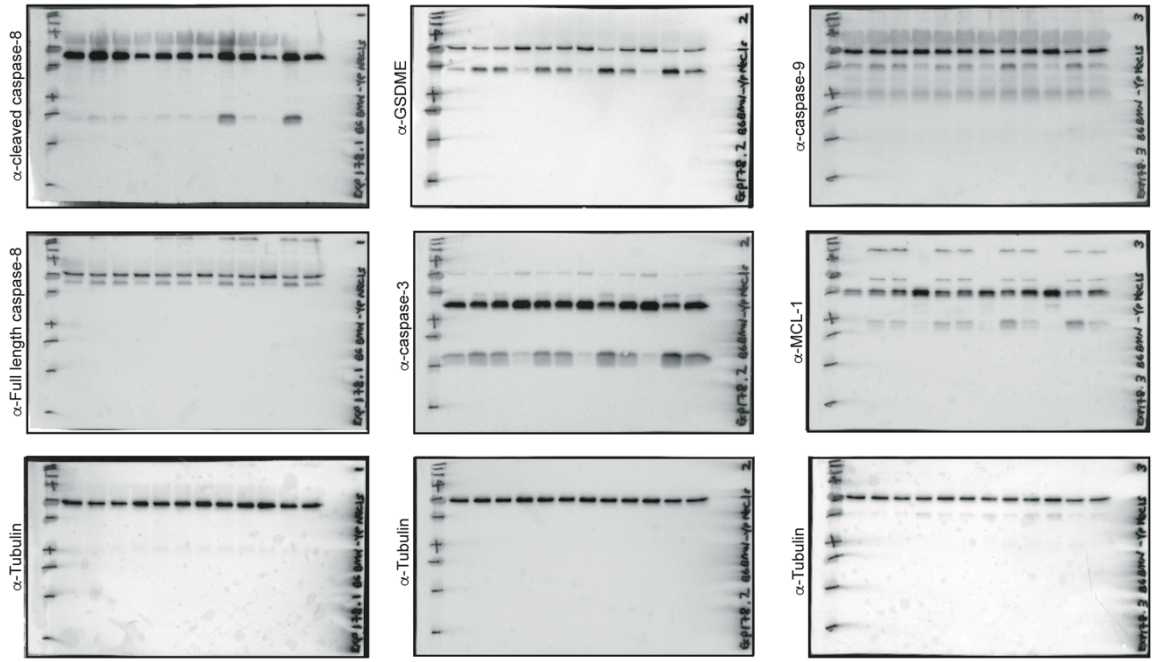

Legend:

- 250 kD
- 150
- 100
- + 75
- 50
- 37
- + 25
- 20
- 15
- 10

Figure 2D uncropped western blots

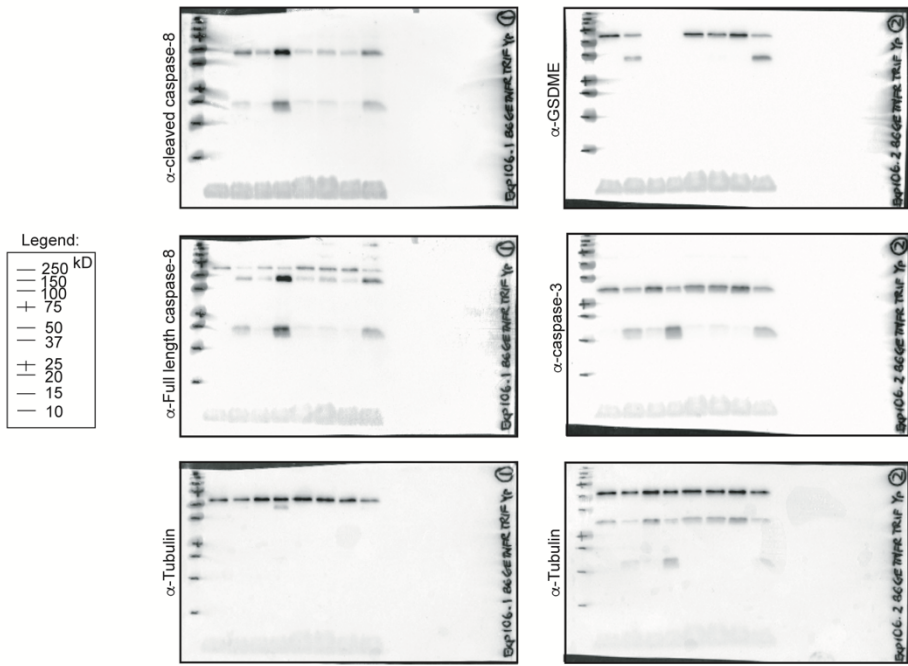

Figure 2E uncropped western blots

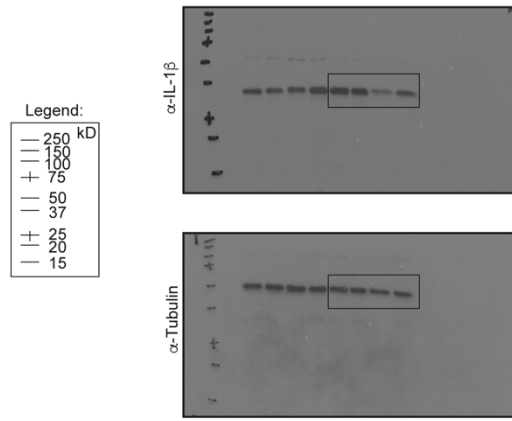

Figure 3D uncropped western blots

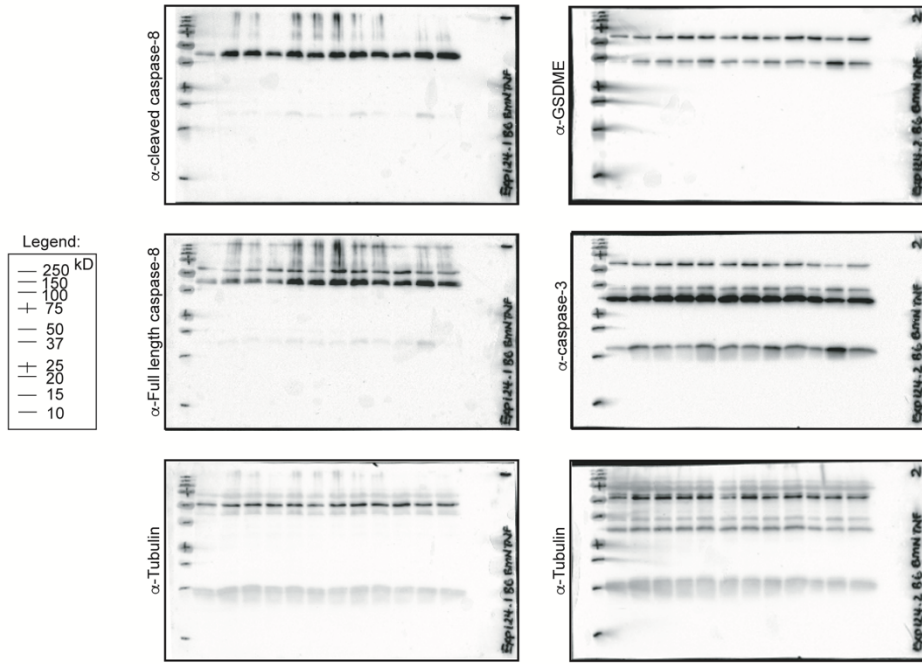

Figure 4E uncropped western blots

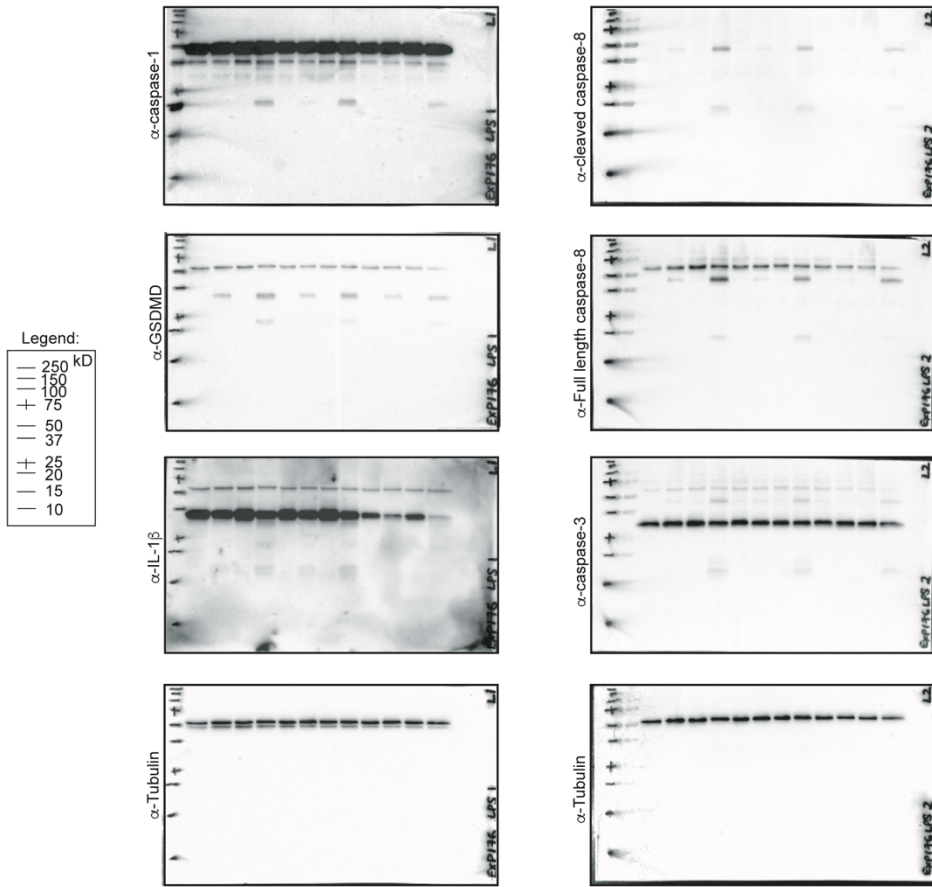

Supplementary figure 4A uncropped western blots

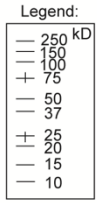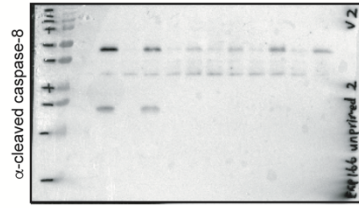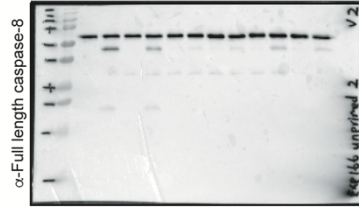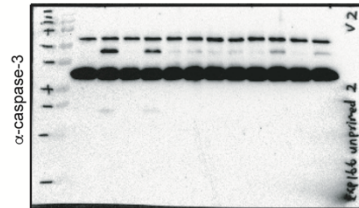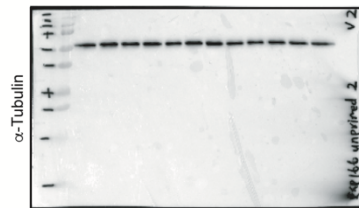

Supplementary figure 4C uncropped western blots

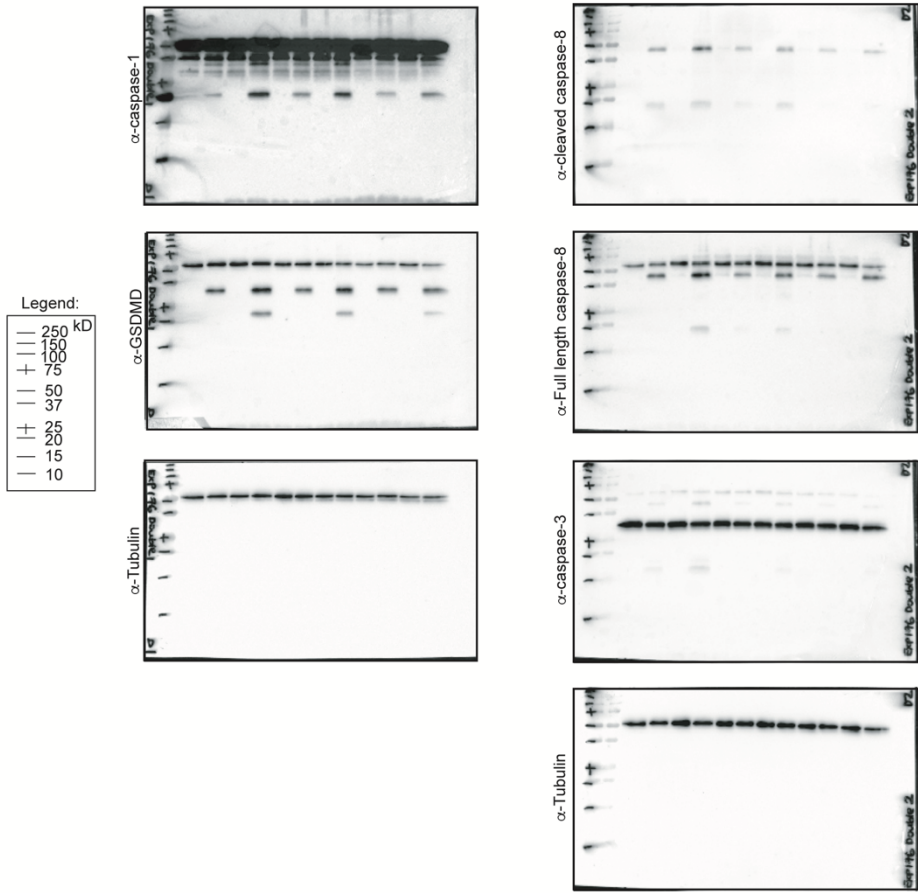

Supplement: 41419_2024_6871_MOESM2_ESM.pdf [file 41419_2024_6871_MOESM2_ESM.pdf]
